## Renal Fluoride Excretion and Plasma Fluoride Levels during and after Enflurane Anesthesia Are Dependent on Urinary pH

Per-Olof Järnberg, M.D.,\* Jan Ekstrand, Ph.D.,† Lars Irestedt, M.D.\*

To determine the effects of urinary pH on fluoride ion excretion and the resulting plasma fluoride concentrations during and after enflurane anesthesia, renal function, plasma inorganic fluoride levels, and fluoride excretion were studied in two groups of patients pretreated with either  $\text{NH}_4\text{Cl}$  or acetazolamide to produce acidic or alkaline urine, respectively. During anesthesia, urinary flow rate, inulin clearance ( $C_{\text{In}}$ ) and para-aminohippurate (PAH) clearance ( $C_{\text{PAH}}$ ) were 7, 61, and 43 per cent of control values in the acidic-urine group and 22, 74, and 57 per cent of control values in the alkaline-urine group, respectively. Fractional fluoride clearances ( $C_{\text{F}}/C_{\text{In}}$ ) during anesthesia and operation were  $0.06 \pm 0.05$  in the acidic-urine group (urinary pH 5.08) and  $0.68 \pm 0.23$  in the alkaline-urine group (urinary pH 8.16). Values of total fluoride excretion during the same period were  $0.06 \pm 0.04$  mg and  $0.87 \pm 0.29$  mg, respectively. Mean maximal plasma levels of fluoride were  $26.3 \pm 7.3 \mu\text{M}$  in the acidic-urine group and  $13.5 \pm 2.4 \mu\text{M}$  in the alkaline-urine group. The differences between groups in fluoride clearance, fluoride excretion, and plasma fluoride levels were all statistically significant. The data clearly show that renal fluoride clearance is closely related to urinary pH. (Key words: Anesthetics, volatile; enflurane. Biotransformation: fluorometabolites. Ions: fluoride. Kidney: function, nephrotoxicity; urine. Metabolism: metabolites. Pharmacokinetics. Toxicity: metabolites.)

THE BIOTRANSFORMATION of enflurane during and after anesthesia and the resulting plasma levels of fluoride are well documented.<sup>1-3</sup> Fluoride ions are cleared from plasma by renal excretion and by uptake into calcified tissues.<sup>4,5</sup> In a previous report, we described how fractional fluoride excretion (fluoride clearance/inulin clearance;  $C_{\text{F}}/C_{\text{In}}$ ) after enflurane anesthesia varied directly with spontaneous urinary pH fluctuations.<sup>6</sup> Fluoride excretion seemed to be related to urinary pH. It was postulated that fluoride was reabsorbed in the renal tubules by nonionic diffusion, most likely in the form of hydrogen fluoride, and that this would increase during acidotic urinary conditions. In the present investigation we have examined whether it is possible to influence fluoride excretion during and after enflurane anesthesia by actively manipulating urinary pH.

\* Assistant Professor of Anesthesiology, Department of Anesthesia, Karolinska Hospital, S-104 01 Stockholm, Sweden.

† Associate Professor of Cariology, Department of Cariology, Karolinska Institute.

Received from the Department of Anesthesiology, Karolinska Hospital, and the Department of Cariology, Karolinska Institute, S-104 01 Stockholm, Sweden. Accepted for publication July 8, 1980. Supported by grants from the Tore Nilsson Fund, Abbott Scandinavia AB, and the Swedish Patent Revenue Fund, Stockholm, Sweden.

Address reprint requests to Dr. Järnberg.

### Materials and Methods

Ten patients undergoing abdominal hysterectomy were investigated. They were randomly divided into two groups of five each. Patients in the first group (mean age 47 years, range 50-43 years; mean weight 63 kg, range 70-58 kg) received ammonium chloride,  $1 \text{ g} \times 4$ , during the day before operation and 1 g on the morning of operation to acidify the urine. Those in the second group (mean age 45 years, range 50-41 years; mean weight 60 kg, range 65-54 kg) received acetazolamide, 500 mg, iv, 60 min before the clearance determinations were started, to alkalinize the urine. The patients had no known history of renal disease. They were receiving no medication except iron. Preoperative plasma electrolyte and creatinine levels were normal. The Ethical Committee of Karolinska Sjukhuset had given its consent to the study, the scope of which was explained to the patients and their informed consent obtained.

Premedication consisted of morphine sulfate, 0.1 mg/kg, and scopolamine hydrobromide, 0.006 mg/kg, administered im. Thiopental, 4 mg/kg, was used for induction, and endotracheal intubation was facilitated by muscle relaxation with pancuronium bromide, 0.1 mg/kg. Anesthesia was maintained with enflurane, 1.5 per cent, in nitrous oxide and oxygen, 2:1. Ventilation was controlled (Engström 300) and adjusted to maintain a normal  $\text{PaCO}_2$  based on blood-gas determinations (Il-413). End-tidal enflurane concentration was measured with a mass spectrometer (Centronic, MGA 200). Stable end-tidal enflurane concentrations were reached after 30 min at  $1.25 \pm 0.12$  per cent (mean  $\pm$  SEM). Anesthetic times was  $150 \pm 6$  min and  $148 \pm 7$  min in the acidic-urine and alkaline-urine groups, respectively.

Renal function was evaluated employing standard clearance techniques. The details are described elsewhere.<sup>3</sup> Sodium, osmolar, and free water clearances were measured and the corresponding fractional excretions were calculated. After priming the patients with inulin and PAH and allowing 60 min for equilibration, there were two 30-min collection periods prior to induction of anesthesia. When end-tidal enflurane concentration had reached near steady state, renal function was studied at 45-min intervals throughout the remaining peroperative anesthesia, then immediately postoperatively during two consecutive three-hour periods.

Inorganic fluoride concentrations in plasma and urine were measured with a fluoride ion-sensitive electrode (96-09, Orion Research). Plasma levels were determined before anesthesia and then every 15 min during and every 60 min after anesthesia for six hours. Fluoride concentrations and pH were measured in all the urine specimens collected during the different clearance periods.

The patients received  $10 \text{ ml} \cdot \text{kg}^{-1} \cdot \text{hr}^{-1}$  of a balanced electrolyte solution containing 25 mg/ml glucose during the equilibration and preoperative measurement periods. All intraoperative fluid losses plus an additional 1,000 ml for insensible fluid losses were replaced with the same solution.

Mean values and standard deviations of the different groups of data were calculated. Student's *t* test for unpaired data was used for statistical comparisons. Differences with a random probability of 5 per cent or less were considered significant.

### Results

Control plasma fluoride concentrations were  $0.7 \pm 0.2 \mu\text{M}$  in both groups. After induction of anesthesia, plasma fluoride concentrations increased

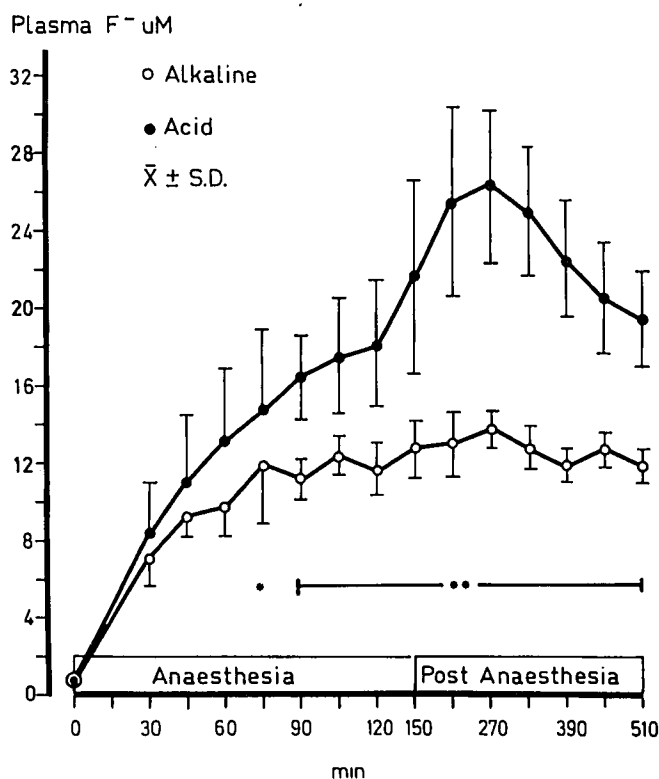

FIG. 1. Plasma fluoride levels before, during, and after enflurane anesthesia in two groups of patients with preoperatively induced alkaline and acidic-urinary conditions (mean  $\pm$  SD). \**P* < 0.05; \*\**P* < 0.01.

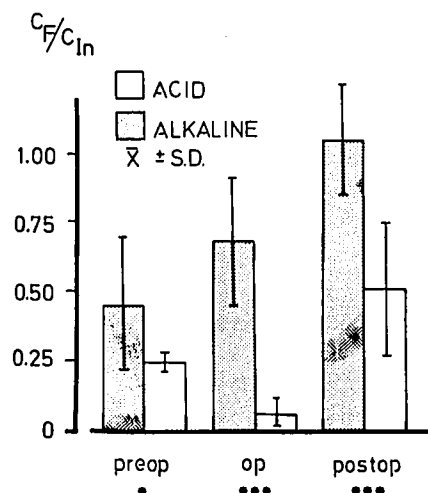

FIG. 2. Fractional fluoride excretion before, during, and after enflurane anesthesia in two groups of patients with preoperatively induced alkaline and acidic-urinary conditions (mean  $\pm$  SD). \**P* < 0.05; \*\*\**P* < 0.001.

rapidly in the two groups (fig. 1). After 45 min of anesthesia, the acidic-urine group (urinary pH  $5.08 \pm 0.25$ ) had higher plasma concentrations of fluoride than did the alkaline-urine group (urinary pH  $8.16 \pm 0.26$ ). Plasma fluoride concentrations increased more rapidly in the patients with acidic urines compared with those with alkaline urines, in whom plasma fluoride levels after 75 min of anesthesia remained almost constant. Maximal fluoride concentrations were  $26.4 \pm 7.9 \mu\text{M}$  and  $13.5 \pm 2.4 \mu\text{M}$  in the acidic-urine and alkaline-urine groups, respectively. These levels were reached two hours after termination of anesthesia.

In the acidic-urine group  $C_F/C_{In}$  decreased from  $0.24 \pm 0.03$  before induction of anesthesia to  $0.06 \pm 0.05$  during anesthesia and operation. Postoperatively, it rose to  $0.51 \pm 0.24$  (fig. 2). Corresponding values in the alkaline-urine group were  $0.45 \pm 0.24$ ,  $0.68 \pm 0.23$ , and  $1.05 \pm 0.20$ , respectively (fig. 2). Total urinary excretion of fluoride during anesthesia was  $0.06 \pm 0.04 \text{ mg}$  in the acidic-urine group, compared with  $0.87 \pm 0.29 \text{ mg}$  in the alkaline-urine group (table 1).

Urinary flow rates (UF) were 5–10 ml/min in both groups before induction of anesthesia, with major reductions during anesthesia and operation (table 2). Postoperatively, UFs were 1.58 ml/min in the acidic-urine group and 2.22 ml/min in the alkaline-urine group (table 2). There was no significant difference between groups concerning renal hemodynamics (table 2).

Preoperatively values for fractional free water excretion ( $C_{H_2O}/C_{In}$ ) were 5.22 in the acidic-urine group and 2.43 in the alkaline-urine group. During

TABLE 1. Fractional Fluoride Excretion ( $C_F/C_{In}$ ), Total Fluoride Excretion ( $U_F \times V$ ), and Urinary pH before, during, and after Enflurane Anesthesia in Acidic and Alkaline Urinary Conditions (Mean  $\pm$  SD)

|                            | $C_F/C_{In}$    |                 |                 | $V_F \times V$ (mg) |                 |                 | Urinary pH      |                 |                 |
|----------------------------|-----------------|-----------------|-----------------|---------------------|-----------------|-----------------|-----------------|-----------------|-----------------|
|                            | Preoperative    | Operative       | Postoperative   | Preoperative        | Operative       | Postoperative   | Preoperative    | Operative       | Postoperative   |
| Acidic                     | $0.24 \pm 0.03$ | $0.06 \pm 0.05$ | $0.51 \pm 0.24$ | $0.02 \pm 0.01$     | $0.06 \pm 0.04$ | $7.01 \pm 1.74$ | $5.73 \pm 0.38$ | $5.08 \pm 0.25$ | $5.77 \pm 0.83$ |
| Alkaline                   | $0.45 \pm 0.24$ | $0.68 \pm 0.23$ | $1.05 \pm 0.20$ | $0.02 \pm 0.01$     | $0.87 \pm 0.29$ | $8.83 \pm 1.24$ | $8.33 \pm 0.39$ | $8.16 \pm 0.26$ | $7.79 \pm 0.18$ |
| Significance of difference | $P < 0.05$      | $P < 0.001$     | $P < 0.001$     | N.S.                | $P < 0.001$     | N.S.            | $P < 0.001$     | $P < 0.001$     | $P < 0.001$     |

anesthesia and operation  $C_{H_2O}/C_{In}$  turned into free water reabsorption ( $T_{H_2O}^e/C_{In}$ ) in both groups. Postoperatively  $T_{H_2O}^e$  increased further in both groups (table 3). Fractional sodium excretion values ( $C_{Na}/C_{In}$ ) in the acidic-urine group were 0.85, 0.47, and 1.28 before, during, and after anesthesia, respectively. Corresponding values in the alkaline-urine group were 6.08, 2.03, and 2.73, respectively (table 3). Fractional osmolar clearances ( $C_{Osm}/C_{In}$ ) had patterns similar to those of  $C_{Na}/C_{In}$  in the two groups (table 3). Arterial blood-gas values were measured only during anesthesia. Values of pH were  $7.36 \pm 0.04$  and  $7.39 \pm 0.03$  in the acidic-urine and alkaline-urine groups, respectively ( $P > 0.05$ ). Corresponding values for  $P_{CO_2}$  in the two groups were  $36 \pm 3$  torr and  $35 \pm 3$  torr, respectively ( $P > 0.05$ ).

### Discussion

The data obtained in the present study clearly show that fluoride excretion in association with enflurane anesthesia is influenced by urinary pH, and that this influence results in significant differences between plasma fluoride levels achieved during acidic and alkaline urinary conditions. Plasma fluoride concentrations in both groups were well below the level associated with renal dysfunction.<sup>7</sup>

Normally, 40–60 per cent of ingested fluoride is excreted in the urine and the remainder is accumu-

lated in the calcified tissues.<sup>4,5,8</sup> Renal handling of fluoride is characterized by glomerular filtration followed by varying extents of tubular reabsorption. Stop-flow studies in dogs have shown that the reabsorption mainly occurs in the distal tubules and the collection ducts.<sup>9</sup> Normal renal clearance of fluoride in healthy volunteers ranges from a third to two thirds of the actual glomerular filtration rate (GFR).<sup>4,8</sup> During enflurane anesthesia  $C_F$  is decreased to approximately a tenth of the actual GFR.<sup>3,6</sup> In the present study,  $C_F/C_{In}$  decreased markedly during anesthesia and operation in the acidic-urine group, while it increased in the alkaline-urine group compared with preoperative control values. This apparent dependency of  $C_F$  on urinary pH was found earlier in rats<sup>10</sup> and in volunteers<sup>11</sup> receiving sodium fluoride. We also observed this in an earlier study.<sup>6</sup> The probable explanation is that fluoride is reabsorbed by non-ionic diffusion, as hydrogen fluoride (HF), from the renal tubules during acidotic urinary conditions. The  $pK_a$  of HF is 3.45.<sup>12</sup> Within the physiologic range of urinary pH,<sup>13</sup> HF would represent 0.003 per cent to approximately 15 per cent of the fluoride in solution. As soon as even small amounts of hydrogen fluoride are formed in the tubules, a diffusion gradient for HF is created, which will increase rapidly as urinary pH decreases. The uncharged HF molecules penetrate the tubular epithelium more easily than do the free

TABLE 2. Urinary Flow Rate (UF), Inulin Clearance ( $C_{In}$ ), and Para-aminohippurate (PAH) Clearance ( $C_{PAH}$ ) before, during, and after Enflurane Anesthesia in Acidic and Alkaline Urinary Conditions (Mean  $\pm$  SD)

|                            | UF (ml/min)     |                 |                 | $C_{In}$ (ml/min) |             |               | $C_{PAH}$ (ml/min) |               |               |
|----------------------------|-----------------|-----------------|-----------------|-------------------|-------------|---------------|--------------------|---------------|---------------|
|                            | Preoperative    | Operative       | Postoperative   | Preoperative      | Operative   | Postoperative | Preoperative       | Operative     | Postoperative |
| Acidic                     | $8.17 \pm 1.58$ | $0.53 \pm 0.18$ | $1.58 \pm 0.87$ | $115 \pm 18$      | $71 \pm 19$ | $119 \pm 11$  | $735 \pm 174$      | $315 \pm 97$  | $667 \pm 245$ |
| Alkaline                   | $6.29 \pm 2.53$ | $1.54 \pm 1.10$ | $2.22 \pm 0.79$ | $106 \pm 26$      | $78 \pm 19$ | $111 \pm 21$  | $689 \pm 242$      | $396 \pm 107$ | $640 \pm 175$ |
| Significance of difference | N.S.            | $P < 0.05$      | N.S.            | N.S.              | N.S.        | N.S.          | N.S.               | N.S.          | N.S.          |

TABLE 3. Fractional Excretions of Sodium ( $C_{Na}/C_{In}$ ), Osmoles ( $C_{Osm}/C_{In}$ ), and Free Water ( $C_{H_2O}/C_{In}$ ) before, during, and after Enflurane Anesthesia in Acidic and Alkaline Urinary Conditions (Mean  $\pm$  SD)

|                            | $C_{Na}/C_{In}$ |                 |                 | $C_{Osm}/C_{In}$ |                 |                 | $C_{H_2O}/C_{In}$ |                  |                  |
|----------------------------|-----------------|-----------------|-----------------|------------------|-----------------|-----------------|-------------------|------------------|------------------|
|                            | Preoperative    | Operative       | Postoperative   | Preoperative     | Operative       | Postoperative   | Preoperative      | Operative        | Postoperative    |
| Acidic                     | $0.85 \pm 0.18$ | $0.47 \pm 0.40$ | $1.28 \pm 0.71$ | $2.33 \pm 0.66$  | $1.35 \pm 0.10$ | $2.80 \pm 1.35$ | $5.22 \pm 1.01$   | $-0.61 \pm 0.13$ | $-1.43 \pm 0.66$ |
| Alkaline                   | $6.08 \pm 2.91$ | $2.03 \pm 1.27$ | $2.73 \pm 1.49$ | $7.30 \pm 2.48$  | $3.36 \pm 1.70$ | $4.18 \pm 2.01$ | $2.43 \pm 1.17$   | $-1.38 \pm 0.67$ | $-1.90 \pm 0.86$ |
| Significance of difference | $P < 0.001$     | $P < 0.01$      | $P < 0.05$      | $P < 0.001$      | $P < 0.01$      | N.S.            | $P < 0.05$        | $P < 0.01$       | N.S.             |

charged fluoride ions. In the peritubular fluid, where pH is higher and the fluoride concentration lower (relative to the tubular fluid), HF is dissociated and the fluoride ions are returned to the systemic circulation via the peritubular capillaries. This continuous removal of fluoride from the interstitium by the peritubular blood flow assures that the diffusion gradient for HF is maintained. The dependency of fluoride reabsorption on urinary pH is similar to the renal handling of other weak acids and bases, such as amphetamine,<sup>14</sup> lidocaine and prilocaine,<sup>15</sup> barbiturates,<sup>16</sup> and ammonia.<sup>17</sup>

Fluoride excretion increases with increasing urinary flow rates.<sup>8,10,18</sup> The reduction in UF during anesthesia and operation, compared with the preoperative period, could thus have contributed to the decrease in  $C_F/C_{In}$  observed in the acidic-urine group. During anesthesia there was a rise in  $C_F/C_{In}$  in the alkaline-urine group, despite a concomitant reduction in UF. This indicates that urinary pH is a relatively more important factor than UF in controlling fluoride excretion. However, the less pronounced decrease in UF in the alkaline-urine group compared with the acidic-urine group, which was due to the use of acetazolamide in the former, might have contributed to the observed difference in  $C_F/C_{In}$ . The difference in UF is, however, not of sufficient magnitude to account for the difference in values obtained for  $C_F/C_{In}$ .<sup>8</sup> The differences in UF, fractional sodium, and osmolar and free water excretion observed between the two groups can be explained by the natriuresis caused by acetazolamide.

Intraoperative changes in  $C_{In}$  and  $C_{PAH}$  were similar in magnitude to those reported to occur with other inhalational anesthetics<sup>19</sup> and with neuroleptanesthesia.<sup>20</sup> Renal hemodynamics were, however, promptly restored postoperatively.

It seems unlikely that the induced urinary pH changes would affect the hepatic metabolism of enflurane, causing the difference in plasma fluoride concentrations. Patients in the acidic-urine group had

a mean blood pH that was slightly lower than that of the alkaline-urine group. Variations in systemic blood pH could theoretically influence hepatic drug metabolism by affecting cytochrome P-450 activity and/or by changing hepatic blood flow, thereby influencing the bioavailability of the drug to the hepatic metabolic system. Changes of pH in the blood may also have influenced the osseous uptake of fluoride. It has been reported that metabolic acidosis increases the rate of reabsorption by bone and that metabolic alkalosis increases the rate of osseous accretion in rats.<sup>21</sup> This could have contributed to the difference in plasma fluoride concentrations.

In conclusion, by alkalization of the urine it is possible to increase fluoride excretion and decrease plasma fluoride levels during and after enflurane anesthesia.

## References

- Maduska AL: Serum inorganic fluoride levels in patients receiving enflurane anesthesia. *Anesth Analg* (Cleve) 53: 351-353, 1974
- Cousins MJ, Greenstein LR, Hitt BA, et al: Metabolism and renal effects of enflurane in man. *ANESTHESIOLOGY* 44: 44-53, 1976
- Järnberg P-O, Ekstrand J, Irestedt L, et al: Renal function and fluoride formation and excretion during enflurane anaesthesia. *Acta Anaesthesiol Scand* 23:444-452, 1979
- Carlson CH, Armstrong WD, Singer L: Distribution and excretion of radio-fluoride in the human. *Proc Soc Exp Biol Med* 104:235-239, 1960
- Smith FA: Metabolism of inorganic fluoride, *Handbook of Experimental Pharmacology*. Edited by FA Smith. Berlin, Springer-Verlag, Vol 20 (I), 1966, pp 53-140
- Järnberg P-O, Ekstrand J, Irestedt L, et al: Fluoride kinetics and renal function during enflurane anaesthesia. *Acta Anaesthesiol Scand* (suppl) 71:20-23, 1979
- Cousins MJ, Mazze RI: Methoxyflurane nephrotoxicity: A study of dose-response in man. *JAMA* 225:1611-1616, 1973
- Ekstrand J, Ehrnebo M, Boreus LO: Fluoride bioavailability after intravenous and oral administration: importance of renal clearance and urine flow. *Clin Pharmacol Ther* 23: 329-337, 1978
- Whitford GM, Pashley OH, Reynold KE: Stop flow studies on

- the renal handling of fluoride (abstr), *J Dent Res* 58: 1257, 1979
10. Whitford GM, Pashely DH, Stringer GI: Fluoride renal clearance: a *pH*-dependent event. *Am J Physiol* 230: 527-532, 1976
  11. Ekstrand J, Ehrnebo M, Whitford GM, et al: Fluoride pharmacokinetics during acid-base changes in man. *Eur J Clin Pharmacol* 18:189-194, 1980
  12. Patel PR, Moreno ES, Patel IM: Ionization of hydrofluoric acid at 25°C. *Journal Research National Bureau Standards* 75 A:205-211, 1971
  13. Rector FC Jr: Acidification of the urine, *Handbook of Physiology. Section 8, Renal Physiology*. American Physiological Society, Washington, D. C., 1971, pp 431-454
  14. Becket AH, Rowland M: Urinary excretion kinetics of amphetamine in man. *J Pharm Pharmacol* 17:628-639, 1965
  15. Eriksson E, Granberg P-O, Örtengren B: Study of renal excretion of prilocaine and lidocaine. *Acta Chir Scand (suppl)* 358:55-69, 1966
  16. Goldstein AL, Aronow L, Kalmen SM: *Principles of Drug Action*. New York, Hoeber Medical Division, Harper and Row, 1968, pp 381-384
  17. Pitts RF: *Physiology of the Kidney and Body Fluids*. Chicago, Year Book Medical Publishers, 1974, pp 217-221
  18. Chen PS Jr, Smith FA, Gardner DE, et al: Renal clearance of fluoride. *Proc Soc Exp Biol Med* 92:879-883, 1956
  19. Deutsch S: Effects of anesthetics on the kidney. *Surg Clin North Am* 55:775-786, 1975
  20. Järnberg P-O, Santesson J, Eklund J: Renal function during neurolept anaesthesia. *Acta Anaesthesiol Scand* 22:167-172, 1978
  21. Barzel US, Jowsey J: The effect of chronic acid and alkali administration on bone turnover in adult rats. *Clin Sci* 36:517-524, 1969
